# Supplementary material for: Modulation of the substrate specificity of the kinase PDK1 by distinct conformations of the full-length protein
Source: PubMed Central journal article supplement (PMC7614687; doi:10.1126/scisignal.add3184), 2023-06-13
Supplement: EMS177231-supplement-Supplemental_Material.pdf [file EMS177231-supplement-Supplemental_Material.pdf]

# 1 SUPPLEMENTAL MATERIAL

## 2 Materials and Methods

### 3 Syntheses of HYG6 and HYG14

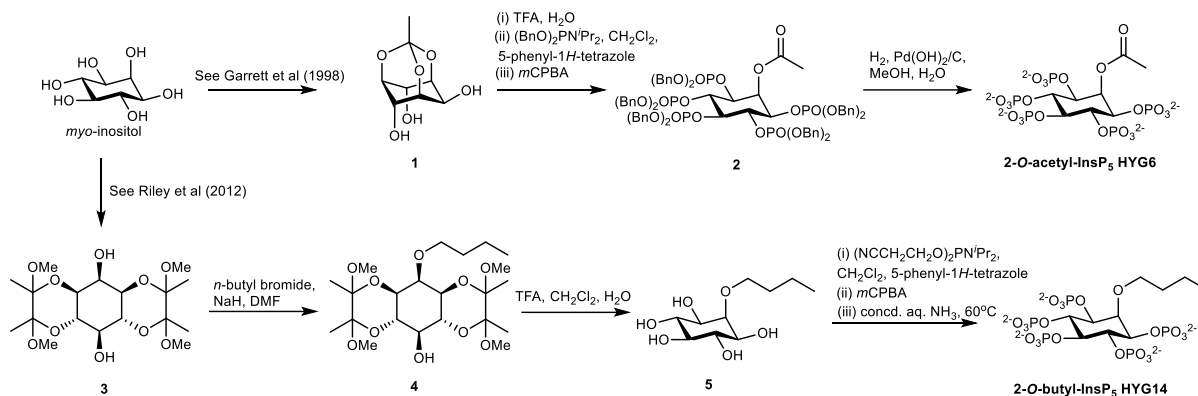

4

5 HYG6 (2-*O*-acetyl-IP<sub>5</sub>) was synthesized from *myo*-inositol by way of *myo*-inositol  
6 orthoacetate (compound 1) (99). Thus, acid-catalyzed regioselective hydrolysis of compound  
7 1 yielded crude 2-*O*-acetyl-*myo*-inositol, which was converted into full-protected  
8 pentakisphosphate (compound 2) by reaction with bis(benzyloxy)(*N,N*-  
9 diisopropylamino)phosphine activated with 5-phenyl-1*H*-tetrazole, followed by oxidation with  
10 *tert*-butyl hydroperoxide. Removal of the ten benzyl protecting groups by hydrogenolysis over  
11 Pd(OH)<sub>2</sub> on carbon yielded 2-*O*-acetyl-IP<sub>5</sub> (HYG6), which was purified by gradient elution  
12 anion exchange chromatography on Q Sepharose Fast Flow resin and isolated as the  
13 triethylammonium salt.

14 HYG14 (2-*O*-butyl-IP<sub>5</sub>) was synthesized by way of diol (compound 3) (100). Thus,  
15 regioselective 2-*O*-alkylation of compound 3 with sodium hydride and 1-bromobutane in DMF  
16 yielded 2-*O*-butyl ether (compound 4). The acid-labile butanediacetal protecting groups were  
17 removed using aqueous trifluoroacetic acid to yield pentaol (compound 5) as a crystalline  
18 solid. Phosphitylation using bis(cyanoethyl)(*N,N*-diisopropylamino)phosphine, activated with  
19 5-phenyl-1*H*-tetrazole, followed by oxidation with *m*CPBA, yielded the fully protected  
20 pentakisphosphate, from which the cyanoethyl protecting groups on phosphates were  
21 cleaved by β-elimination using aqueous ammonia at 60°C. The product was purified by  
22 gradient elution anion exchange chromatography on Q Sepharose Fast Flow resin to yield  
23 pure HYG14 isolated as the triethylammonium salt.

24 2-*O*-Acetyl 1,3,4,5,6-pentakis-*O*-[bis(benzyloxy)phosphoryl] *myo*-inositol (compound 2)  
25 A mixture of TFA (1.8 ml) and water (0.2 ml) was added to orthoacetate (compound 1) (200 mg,  
26 0.98 mmol) and the resulting solution was stirred for 5 min, after which TLC (ethyl acetate)  
27 indicated the complete conversion of starting material (R<sub>f</sub> 0.5) into a product (R<sub>f</sub> 0.0). The  
28 reaction mixture was co-evaporated with water, then with dichloromethane in vacuo to obtain 2-  
29 *O*-acetyl *myo*-inositol (218 mg) as a white solid, which was dried under vacuum. 5-phenyl-1*H*-  
30 tetrazole (1.32 g, 9.00 mmol) and dry dichloromethane (5 mL) were added to this solid under an  
31 atmosphere of argon, which was followed by the addition of bis(benzyloxy)(*N,N*-  
32 diisopropylamino)phosphine (1.81 mL, 5.40 mmol). Stirring continued for 1 h at room  
33 temperature, after which TLC (1:1, ethyl acetate:pet. ether) confirmed the complete consumption  
34 of starting material (R<sub>f</sub> 0.0) to a product (R<sub>f</sub> 0.9). The reaction mixture was cooled to -40 °C and  
35 70% *t*BuOOH (1.29 mL, 9.00 mmol) was added portionwise while stirring. The cooling bath was  
36 removed and the mixture was allowed to reach room temperature. After 15 min, TLC (1:1, ethyl  
37 acetate:pet. ether) showed complete oxidation of pentakisphosphite to pentakisphosphate (R<sub>f</sub>  
38 0.3). The reaction mixture was diluted with dichloromethane (100 mL), washed with 10% sodium

39 sulphite solution (2 × 100 mL), dried and concentrated in vacuo. The residue was purified by  
40 column chromatography (pet. ether:ethyl acetate, 1:1 to 1:2) to generate Compound 2 (1.18 g,  
41 80%) as a colorless oil. <sup>31</sup>P NMR (161.9 MHz, H-decoupled, CDCl<sub>3</sub>) δ -1.84 (2 P, s), -1.46 (2 P,  
42 s), -1.21 (1 P, s, phosphate at C-5); <sup>1</sup>H NMR (400 MHz, CDCl<sub>3</sub>) δ 2.00 (3H, s, CH<sub>3</sub>), 4.43-4.54,  
43 4.91-5.06 (3 H : 22 H, m, C-1-H, C-3-H, C-4-H, C-5-H, C-6-H and 10 × CH<sub>2</sub>Ar), 6.00 (1 H, br s, C-  
44 2-H), 7.14-7.23 (50 H, m, Ar-H); <sup>13</sup>C NMR (100.6 MHz, CDCl<sub>3</sub>) δ<sub>C</sub> 20.6 (CO<sub>2</sub>CH<sub>3</sub>), 68.1 (C-2),  
45 69.5, 69.6, 69.6, 69.7, 69.7, 69.8, 69.8 (10 × CH<sub>2</sub>Ar), 72.9 (C-1 & C-3), 74.6 (C-5), 74.8 (C-4 & C-  
46 6), 127.9, 128.0, 128.0, 128.1, 128.1, 128.2, 128.2, 128.3, 128.3, 128.3, 128.4, 128.4, 128.4,  
47 128.5 (50 × Ar-C), 135.6, 135.6, 135.8, 135.8, 135.8, 135.9 (10 × Ar-C<sub>ipso</sub>), 169.0 (CO<sub>2</sub>CH<sub>3</sub>);  
48 HRMS (ESI-TOF) *m/z*: [M + H]<sup>+</sup> calculated for C<sub>78</sub>H<sub>80</sub>O<sub>22</sub>P<sub>5</sub> 1523.3829; found 1523.3824; HRMS  
49 (ESI-TOF) *m/z*: [M + Na]<sup>+</sup> calculated for C<sub>78</sub>H<sub>79</sub>O<sub>22</sub>P<sub>5</sub>Na 1545.3649; found 1545.3643.

50  
51 2-O-Acetyl *myo*-inositol 1,3,4,5,6-pentakisphosphate (HYG6)

52 Compound 2 (600 mg, 0.39 mmol) was dissolved in methanol (15 mL) and water (3 mL) and  
53 10% palladium hydroxide on activated charcoal (100 mg) was added. The resulting suspension  
54 was shaken in a Parr hydrogenator under H<sub>2</sub> for 20 h at room temperature. The catalyst was  
55 filtered through a PTFE syringe filter and the filtrate was evaporated under reduced pressure.  
56 The hygroscopic white foam was purified by ion exchange chromatography on Q Sepharose Fast  
57 Flow resin and eluted with a gradient of aqueous TEAB (0 to 2.0 M) to generate HYG6 (312 mg,  
58 76%) as the triethylammonium salt. <sup>31</sup>P NMR (161.9 MHz, H-decoupled, D<sub>2</sub>O) δ -0.75 (2 P, s),  
59 0.24 (2 P, s), 0.57 (1 P, s, phosphate at C-5); <sup>1</sup>H NMR (400 MHz, D<sub>2</sub>O) δ 1.12 (~37 H, t, *J* 7.4 Hz,  
60 CH<sub>3</sub> of TEA<sup>+</sup>), 2.06 (3 H, s, CO<sub>2</sub>CH<sub>3</sub>), 3.05 (~25 H, q, *J* 7.4 Hz, CH<sub>2</sub> of TEA<sup>+</sup>), 4.12-4.22 (3 H, m, *J*  
61 2.8, 9.4, 9.8 Hz, C-1-H, C-3-H and C-5-H), 4.36 (2 H, ap. quartet, ddd, C-4-H and C-6-H), 5.58 (1  
62 H, t, *J* 2.8 Hz, C-2-H); <sup>13</sup>C NMR (100.6 MHz, D<sub>2</sub>O) δ<sub>C</sub> 8.2 (CH<sub>3</sub> of TEA<sup>+</sup>), 20.2 (CO<sub>2</sub>CH<sub>3</sub>), 46.5  
63 (CH<sub>2</sub> of TEA<sup>+</sup>), 71.6 (C-2), 72.1 (C-1 and C-3), 76.3 (C-4 and C-6), 77.0 (C-5), 172.6 (CO<sub>2</sub>CH<sub>3</sub>);  
64 HRMS (ESI-TOF) *m/z*: [M - H]<sup>-</sup> calculated for C<sub>8</sub>H<sub>18</sub>O<sub>22</sub>P<sub>5</sub> 620.8983; found 620.9000.

65  
66 2-O-Butyl 1,6:3,4-bis-[O-(2,3-dimethoxybutane-2,3-diyl)]-*myo*-inositol (compound 4)

67 Sodium hydride (118 mg of a 60% dispersion in oil, 2.94 mmol) was added in portions to a  
68 suspension of 1,6:3,4-bis-[O-(2,3-dimethoxybutane-2,3-diyl)]-*myo*-inositol (compound 3) (1.0 g,  
69 2.45 mmol) in anhydrous DMF (60 ml). The resulting suspension was stirred for 1 h and 1-  
70 bromobutane (0.29 mL, 2.69 mmol) was added dropwise over 1 h. Stirring was continued for a  
71 further 20 h, after which TLC (hexane:ethyl acetate, 2:1) showed the conversion of starting  
72 material (R<sub>f</sub> 0.0) to a product (R<sub>f</sub> 0.3) and the excess sodium hydride was destroyed by the  
73 dropwise addition of methanol. The solvents were removed under reduced pressure and the  
74 residue was dissolved in dichloromethane (100 mL), washed with water (100 mL), brine (100  
75 mL), dried (MgSO<sub>4</sub>) and evaporated in vacuo. The resulting compound was purified by flash  
76 column chromatography (hexane:ethyl acetate, 2:1) to generate 2-O-butyl ether (compound 4)  
77 (870 mg, 77%) as a white solid, m.p. 185-187 °C (ethyl acetate); <sup>1</sup>H NMR (400 MHz, D<sub>2</sub>O) δ  
78 0.90 (3H, t, *J* = 7.4 Hz, O(CH<sub>2</sub>)<sub>3</sub>CH<sub>3</sub>), 1.27 (6H, s, 2 × CH<sub>3</sub>), 1.29 (6H, s, 2 × CH<sub>3</sub>), 1.40 (2H,  
79 sextet, *J* = 7.4 Hz, O(CH<sub>2</sub>)<sub>2</sub>CH<sub>2</sub>CH<sub>3</sub>), 1.55 (2H, pentet, *J* = 6.1 Hz, OCH<sub>2</sub>CH<sub>2</sub>CH<sub>2</sub>CH<sub>3</sub>), 2.55 (1H,  
80 d, *J* = 2.0 Hz, 5-OH), 3.22 (6H, s, 2 × OCH<sub>3</sub>), 3.26 (6H, s, 2 × OCH<sub>3</sub>), 3.45 (2H, dd, *J*<sub>1,2</sub> = *J*<sub>2,3</sub> = 2.5  
81 Hz, *J*<sub>1,6</sub> = *J*<sub>3,4</sub> = 10.2 Hz, C-1-H and C-3-H), 3.62-3.65 (2H, m, C-2-H and C-5-H), 3.70 (2H, t, *J* =  
82 6.1 Hz, OCH<sub>2</sub>(CH<sub>2</sub>)<sub>2</sub>CH<sub>3</sub>), 3.97 (2H, t, *J*<sub>4,5</sub> = *J*<sub>5,6</sub> = 10.2 Hz, C-4-H and C-6-H); <sup>13</sup>C NMR (100.6  
83 MHz, D<sub>2</sub>O) δ<sub>C</sub> 13.9 (q, O(CH<sub>2</sub>)<sub>3</sub>CH<sub>3</sub>), 17.6 (q, 2 × CH<sub>3</sub>), 17.7 (q, 2 × CH<sub>3</sub>), 19.1 (t, O(CH<sub>2</sub>)<sub>2</sub>CH  
84 <sub>2</sub>CH<sub>3</sub>), 32.1 (t, OCH<sub>2</sub>CH<sub>2</sub>CH<sub>2</sub>CH<sub>3</sub>), 47.8 (q, 2 × OCH<sub>3</sub>), 47.9 (q, 2 × OCH<sub>3</sub>), 69.1 (d, C-1 and C-3),  
85 69.3 (d, C-4 and C-6), 70.7 (d, C-5), 72.1 (t, OCH<sub>2</sub>(CH<sub>2</sub>)<sub>2</sub>CH<sub>3</sub>), 76.6 (d, C-2), 99.0 (s,  
86 C(CH<sub>3</sub>)OCH<sub>3</sub>), 99.5 (s, C(CH<sub>3</sub>)OCH<sub>3</sub>); elemental analysis calculated for C<sub>22</sub>H<sub>40</sub>O<sub>10</sub> (464.55) C,  
87 56.88; H, 8.68; found C, 57.2; H, 8.79.

88  
89 2-O-Butyl-*myo*-inositol (compound 5)

90 Aqueous TFA (90%, 5 mL) was added to a solution of 2-O-butyl ether (compound 4) (700 mg,  
91 1.51 mmol) in dichloromethane (5 mL). The reaction mixture was stirred for 10 min at room

92 temperature, after which TLC (hexane:ethyl acetate, 2:1) indicated the complete conversion  
93 of starting material ( $R_f$  0.3) into a product ( $R_f$  0.0). The solvents were then removed by  
94 evaporation in vacuo followed by co-evaporation with methanol a few times until all the traces of  
95 butanedione (yellow in colour) was removed to give the pure tetraol (compound 5) (356 mg,  
96 quantitative) as a white solid, m.p. 224-226 °C (methanol);  $^1\text{H}$  NMR (400 MHz, DMSO- $d_6$ )  $\delta$  0.87  
97 (3 H, t,  $J$  7.2 Hz,  $\text{O}(\text{CH}_2)_3\text{CH}_3$ ), 1.32 (2 H, sextet,  $J$  7.4 Hz,  $\text{O}(\text{CH}_2)_2\text{CH}_2\text{CH}_3$ ), 1.45 (2 H, pentet,  $J$   
98 6.8 Hz,  $\text{OCH}_2\text{CH}_2\text{CH}_2\text{CH}_3$ ), 2.88 (1 H, ddd,  $J$  2.8, 4.3, 9.0 Hz, C-5-H), 3.14-3.19 (2 H, m, C-1-H  
99 and C-3-H), 3.32 (2 H, ddd,  $J$  4.3, 9.0 Hz, C-4-H and C-6-H), 3.47 (1 H, t,  $J$  2.6 Hz, C-2-H), 3.63  
100 (2H, t,  $J$  6.7 Hz,  $\text{OCH}_2(\text{CH}_2)_2\text{CH}_3$ ), 4.37 (2 H, d,  $J$  4.7 Hz, C-1-OH and C-3-OH), 4.55 (3 H, br s,  
101 C-4-OH, C-5-OH and C-6-OH);  $^{13}\text{C}$  NMR (100.6 MHz, DMSO- $d_6$ )  $\delta_c$  13.9 ( $\text{O}(\text{CH}_2)_3\text{CH}_3$ ), 18.8  
102 ( $\text{O}(\text{CH}_2)_2\text{CH}_2\text{CH}_3$ ), 32.1 ( $\text{OCH}_2\text{CH}_2\text{CH}_2\text{CH}_3$ ), 72.0 (C-1 and C-3), 72.3 ( $\text{OCH}_2(\text{CH}_2)_2\text{CH}_3$ ), 73.0  
103 (C-4 and C-6), 75.3 (C-5), 81.8 (C-2); elemental analysis, calculated for  $\text{C}_{10}\text{H}_{20}\text{O}_6$  (236.26) C,  
104 50.84; H, 8.53; found C, 50.97; H, 8.61.

105

#### 106 2-O-Butyl-*myo*-inositol-1,3,4,5,6-pentakisphosphate (HYG14)

107 To a solution of 2-O-butyl *myo*-inositol (compound 5) (300 mg, 1.27 mmol) and 5-phenyl-1*H*-  
108 tetrazole (1.39 mg, 9.52 mmol) in dry dichloromethane (10 mL) under an atmosphere of  
109 argon, was added bis(cyanoethoxy)(*N,N*-diisopropylamino)phosphine (2.54 g, 9.52 mmol).  
110 Stirring was continued for 1 h at room temperature, after which TLC (ethyl acetate:ethanol,  
111 4:1) confirmed the complete conversion of starting material ( $R_f$  0.0) into a product ( $R_f$  0.8).  
112 The reaction mixture was cooled to -40 °C and *m*CPBA (77%, 2.84 g, 12.70 mmol) was added  
113 portionwise while stirring. The cooling bath was removed and the mixture was allowed to reach  
114 room temperature. After 15 min, TLC (ethyl acetate:ethanol, 4:1) showed complete oxidation  
115 of pentakisphosphite to pentakisphosphate ( $R_f$  0.2) and the reaction mixture was diluted with  
116 ethyl acetate (100 mL), washed with 10% sodium sulphite solution (2 × 200 mL), dried and solvent  
117 evaporated in vacuo. The resulting compound was then dissolved in concentrated aqueous  
118 ammonia solution (30 mL) and heated at 60°C overnight in a Pyrex pressure tube. After  
119 evaporation of solution under vacuum, the residue was purified by ion exchange chromatography  
120 on Q Sepharose Fast Flow resin and eluted with a gradient of aqueous TEAB (0 to 2.0 M) to yield  
121 the pure triethylammonium salt of 2-O-butyl *myo*-inositol 1,3,4,5,6-pentakisphosphate HYG14  
122 (1.12 g, 81%) as a hygroscopic white solid.  $^{31}\text{P}$  NMR (161.9 MHz, H-decoupled,  $\text{D}_2\text{O}$ )  $\delta$  -0.70  
123 (2P, s), 0.11 (2P, s), 0.65 (1P, s, phosphate at C-5);  $^1\text{H}$  NMR (400 MHz,  $\text{D}_2\text{O}$ )  $\delta$  0.68-0.73  
124 (3H, m,  $\text{O}(\text{CH}_2)_3\text{CH}_3$ ), 1.05-1.10 (~34H, m,  $\text{CH}_3$  of  $\text{TEA}^+$ ), 1.20-1.23 (2H, m,  $\text{O}(\text{CH}_2)_2\text{CH}$   
125  $_2\text{CH}_3$ ), 1.38-1.40 (2H, m,  $\text{OCH}_2\text{CH}_2\text{CH}_2\text{CH}_3$ ), 2.96-3.02 (~24H, m,  $\text{CH}_2$  of  $\text{TEA}^+$ ), 3.65-3.67  
126 (2H, m,  $\text{OCH}_2(\text{CH}_2)_2\text{CH}_3$ ), 3.96-4.03 (4H, m, C-1-H, C-2-H, C-3-H and C-5-H), 4.26-4.31 (2H,  
127 m, C-4-H and C-6-H);  $^{13}\text{C}$  NMR (100.6 MHz,  $\text{D}_2\text{O}$ )  $\delta_c$  8.1 (q,  $\text{CH}_3$  of  $\text{TEA}^+$ ), 13.2 (q,  
128  $\text{O}(\text{CH}_2)_3\text{CH}_3$ ), 18.5 (t,  $\text{O}(\text{CH}_2)_2\text{CH}_2\text{CH}_3$ ), 31.4 (t,  $\text{OCH}_2\text{CH}_2\text{CH}_2\text{CH}_3$ ), 46.5 (t,  $\text{CH}_2$  of  $\text{TEA}^+$ ),  
129 73.9 (t,  $\text{OCH}_2(\text{CH}_2)_2\text{CH}_3$ ), 74.1 (m, C-1 and C-3), 76.3 (m, C-4 and C-6), 77.5, 78.0 (2 × m, C-  
130 2 and C-5); HRMS (ESI-TOF)  $m/z$ :  $[\text{M} - \text{H}]^-$  calculated for  $\text{C}_{10}\text{H}_{24}\text{O}_{21}\text{P}_5$  634.9504; found  
131 634.9525

132

133

134

135

136

137

138

139

140 **Figure S1**

141 **A**

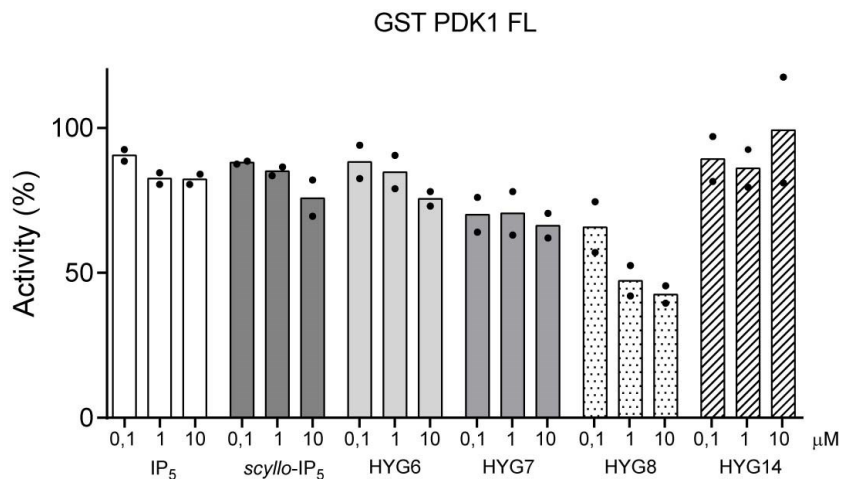

142

143 **B**

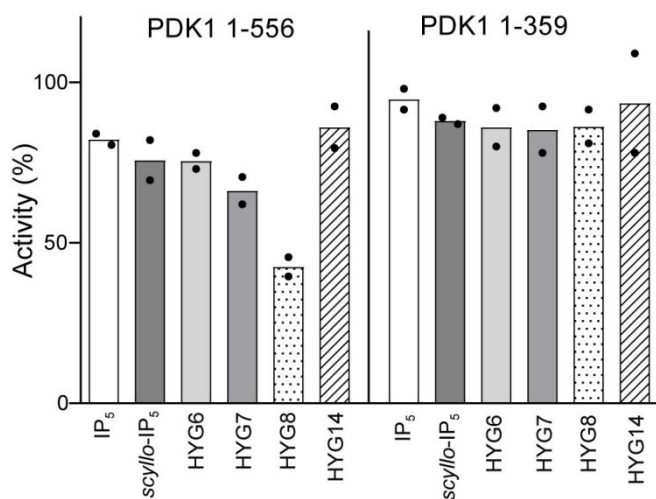

144

145 **Figure S1. Inositol phosphates and derivatives do not potently inhibit the intrinsic**  
146 **activity of PDK1.** (A) The effect of inositol phosphates and derivatives was assessed on the  
147 kinase activity of full-length GST-PDK1<sub>1-556</sub> toward T308tide. (B) The effect of inositol  
148 phosphates and derivatives (10μM) was assessed on the kinase activity of full-length GST-  
149 PDK1<sub>1-556</sub> and a construct comprising the catalytic domain but lacking the linker region and  
150 the PH domain, PDK1<sub>1-359</sub>, toward T308tide. N=2 independent experiments.

151

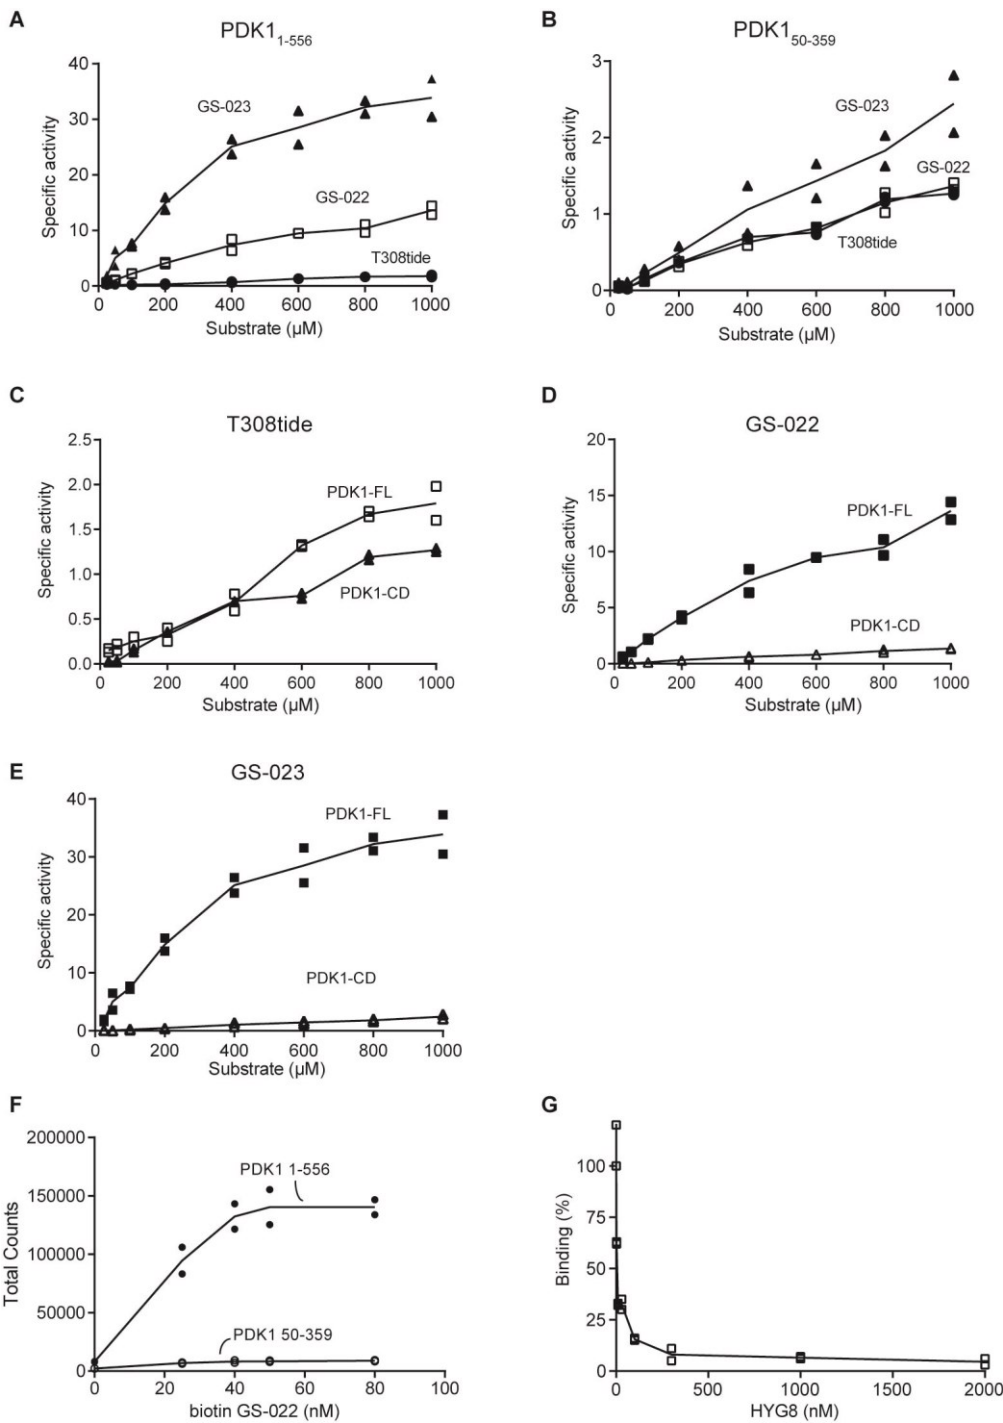

153

154 **Figure S2. Analysis of the “PDK1 Direct” commercial assay.** (A-E) The activity of GST-  
 155 PDK1<sub>1-556</sub> or GST-PDK1<sub>1-359</sub> was measured using [<sup>32</sup>P]ATP and different substrates:  
 156 T308tide, derived from the activation loop of Akt and two alternative “improved” substrates;  
 157 GS-022 (RRRQFSLRRKAK); and GS-023 (RRRQFSLRRKA-K(5-FAM)). (A) Specific activity  
 158 of GST-PDK1<sub>1-556</sub> towards the three substrates. N=2 independent experiments. (B) Specific  
 159 activity of GST-PDK1<sub>1-359</sub> towards the three substrates. N=2 independent experiments. (C)  
 160 Analysis of T308tide as a substrate of GST-PDK1<sub>1-556</sub> and GST-PDK1<sub>1-359</sub>. N=2 independent  
 161 experiments. (D) Analysis of GS-022 as a substrate of GST-PDK1<sub>1-556</sub> and GST-PDK1<sub>1-359</sub>.  
 162 Analysis of GS-023 as a substrate of GST-PDK1<sub>1-556</sub> and GST-PDK1<sub>1-359</sub>. N=2

163 independent experiments. (F-G) Interaction and displacement of interactions using  
164 AlphaScreen technology. (F) Interaction of biotin-GS-022 with GST-PDK1<sub>1-556</sub> and GST-  
165 PDK1<sub>1-359</sub>. N=2 independent experiments. (G) Effect of HYG8 on the interaction between  
166 biotin-GS-022 and GST-PDK1<sub>1-556</sub>. N=2 independent experiments.

167 The Thermo Fisher Scientific "PDK1 Direct" assay produced results quite different from those  
168 obtained using our PDK1 kinase assay which uses [ $\gamma$ <sup>32</sup>P]ATP and T308tide  
169 (KTFCGTPEYLAPEVRR) as substrates. Phosphorylation of T308tide and of the alternative  
170 peptides GS-022 (RRRQFSLRRKAK) and GS-023 (RRRQFSLRRKA-K(5-FAM)) was  
171 compared. GS-023 and GS-022 were phosphorylated efficiently by GST-PDK1<sub>1-556</sub>, with over  
172 30 and 10-fold higher turnover than T308tide, respectively (fig. S2A). The increased  
173 phosphorylation of GS-023 indicated that the fluorescein molecule at the C-terminal of the  
174 GS-023 peptide provided a degree of improvement of substrate phosphorylation by PDK1<sub>1-  
175 556</sub>. GST-PDK1<sub>1-359</sub>, comprising only the catalytic domain but lacking the linker region and the  
176 PH domain, phosphorylated the three substrates similarly, with a slight increased turnover  
177 towards GS-023 (fig. S2B). Thus, the phosphorylation of GS-23 and GS-022, but not that of  
178 T308tide, depended on the construct used (figs. S2C-E). To assess a possible differential  
179 binding of GS-022 to GST-PDK1<sub>1-556</sub> and GST-PDK1<sub>1-359</sub>, we used an AlphaScreen assay  
180 that measured the interaction of biotin-GS-022 with GST-PDK1<sub>1-556</sub> and GST-PDK1<sub>1-359</sub>.  
181 Biotin-GS-022 showed increased binding to GST-PDK1<sub>1-556</sub> (150 nM) compared to the  
182 construct comprising the catalytic domain (fig. S2F). We concluded that the increased  
183 phosphorylation of GS-022 could be due to an additional interaction site for the linker-PH  
184 domain which increases the affinity of GS-022 for PDK1<sub>1-556</sub>. HYG8 potently displaced the  
185 interaction between GS-022 and PDK1<sub>1-556</sub> (fig. S2G), which could explain how a decrease in  
186 the phosphorylation of a substrate in an in vitro protein kinase assay could be due to a  
187 compound altering the docking interaction of the peptide substrate. We suggest that the  
188 inhibitory effect of HYG8 in the "PDK1 Direct" assay could be due to the specific disruption of  
189 a "docking" interaction of the Ser/Thr 07 peptide substrate with PDK1. Although the "PDK1  
190 direct" assay does not always reflect the intrinsic kinase activity of PDK1, our results indicate  
191 that the Thermo Fisher Scientific activity assays using Ser/Thr 07 or the AlphaScreen  
192 interaction between PDK1 and biotin-GS-022 can be used to assess the relative  
193 conformation of PDK1.

194

A

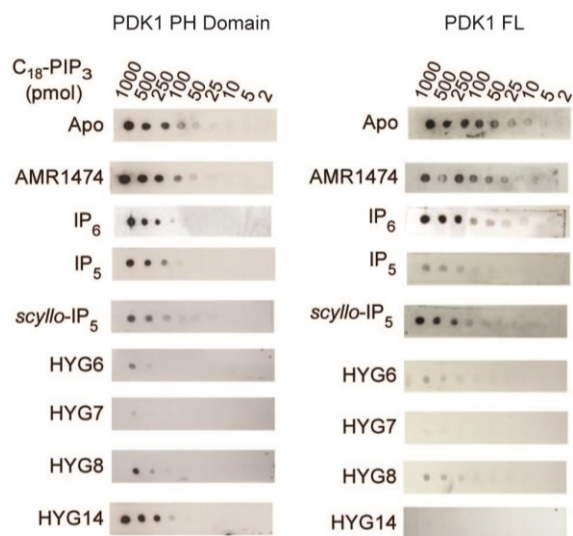

B

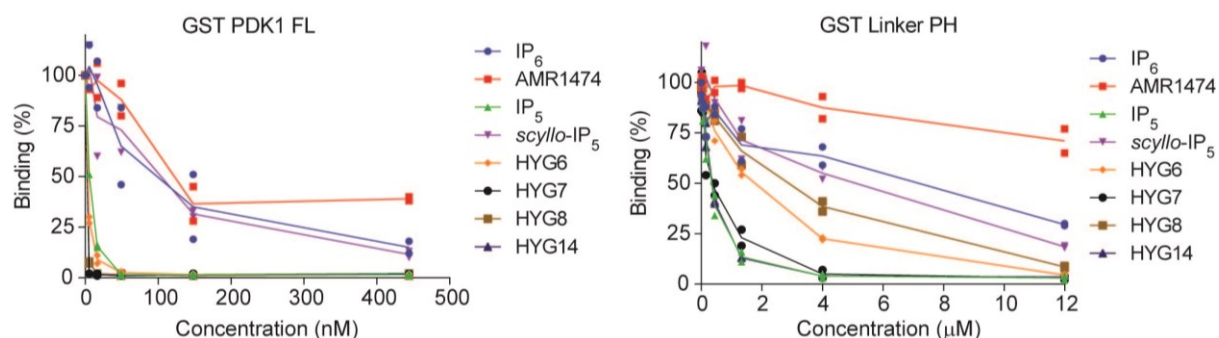

196

197 **Figure S3. The ability of inositol phosphates and derivatives to displace PIP<sub>3</sub> from**  
 198 **PDK1<sub>1-556</sub> and from the PH domain of PDK1 can depend on the construct used.** (A) The  
 199 effect of inositol polyphosphates and synthetic derivatives (10 µM and 1 µM respectively)  
 200 on the interaction between the isolated PH domain of PDK1 (residues 408-556; 10 nM) or full-  
 201 length PDK1 (GST-PDK1<sub>1-556</sub>; 10 nM) and C<sub>18</sub>-PIP<sub>3</sub> spotted on a membrane. N=2  
 202 independent experiments. (B) The interaction of linker-PH(PDK1<sub>360-556</sub>)-PIP<sub>3</sub> and PDK1-FL  
 203 (PDK1<sub>1-556</sub>)-PIP<sub>3</sub> was measured using AlphaScreen technology and the ability of compounds  
 204 to displace the interaction was tested. These are the expanded curves for all compounds of  
 205 the results shown in Figs. 3D-G (N=2 independent experiments).

206

207

208

209

210

211

212 **Figure S4**

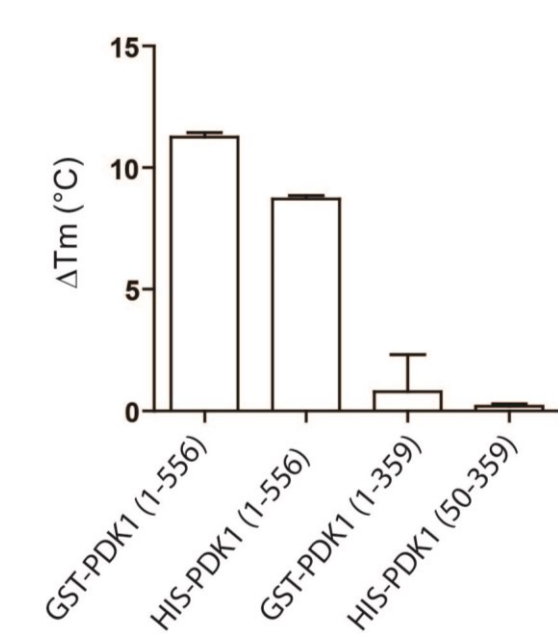

213

214 **Figure S4. HYG8 stabilizes GST-PDK1<sub>1-556</sub> and His-PDK1<sub>1-556</sub> in thermal shift assays.**  
215 The effect of HYG8 (20  $\mu$ M) on the thermal stability of different constructs of PDK1 was  
216 assessed. N=3 independent experiments.

217

218 **Figure S5**

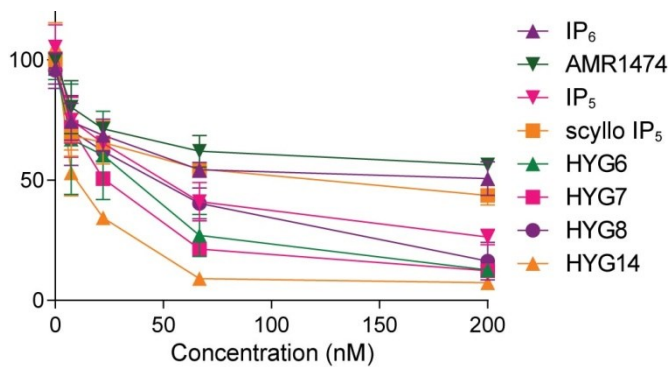

219

220 **Figure S5. Displacement of PDK1 FL - PDK1 FL dimers by all compounds.** The ability of  
221 compounds to displace the interaction between His-PDK1<sub>1-556</sub> and GST-PDK1<sub>1-556</sub> was  
222 measured using AlphaScreen technology. N=3 independent experiments. Fig. 4D presents a  
223 subset of these compounds for clarity.

224

225

226

227



228 **Figure S6**

229 **A**

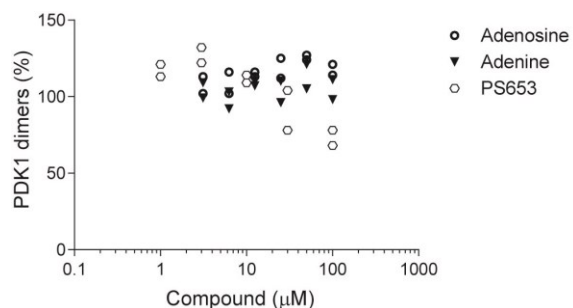

**B**

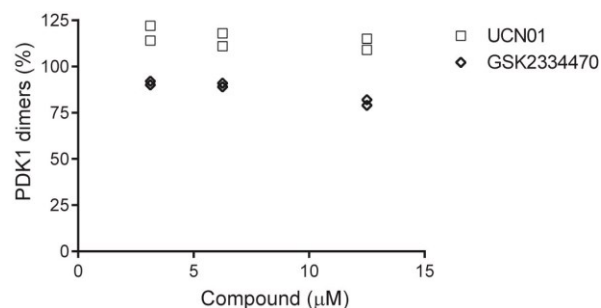

230

231

232 **Figure S6. Small molecules that bind to the ATP-binding site and allosterically affect**  
233 **the PIF pocket do not affect the formation of PDK1 dimers.**

234 (A-B) The effect of adenosine, adenine, PS653, GSK2334470 and UCN01 on the formation  
235 of His-PDK1<sub>1-556</sub> and GST-PDK1<sub>360-556</sub> dimers was evaluated using an AlphaScreen-based  
236 interaction assay. N=2 independent experiments.

237

**A**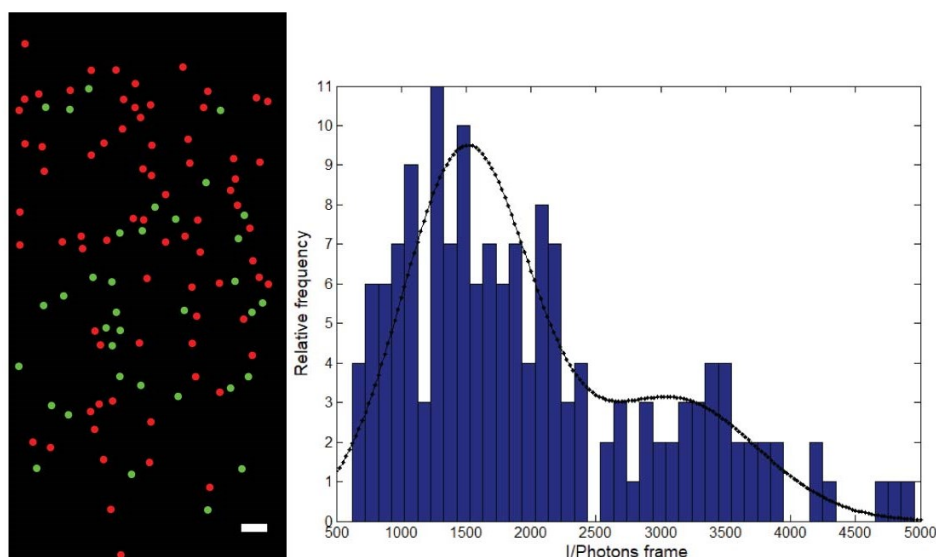**B**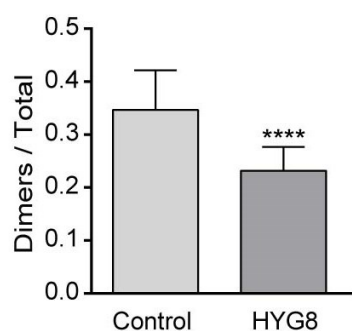

239

240 **Figure S7. Single particle fluorescence identifies PDK1<sub>1</sub> dimers and disruption of dimers by**  
 241 **HYG8.** (A) STORM image with 100 ms exposure showing single molecule localizations of  
 242 His-SNAP-PDK1<sub>50-556</sub> labelled with TMR. Monomers are shown as red dots (74 localizations  
 243 displayed in the image), whereas dimers are shown as green dots (35 localizations in the  
 244 image). An intensity histogram of the brightness of the spots is shown in the image, fitted to a  
 245 sum of two Gaussians. Monomers are identified as spots in the intensity range 500-2500,  
 246 whereas dimers correspond to the intensity range 2500-4500. For each independent  
 247 experiment, 15 random images like the one shown were used to average the proportion of  
 248 monomers and dimers under each condition. Scale bar 1.5 $\mu$ m. (B) Single particle  
 249 fluorescence identifies PDK1<sub>1-556</sub> dimers and disruption of dimers by HYG8. Shown is one of  
 250 three independent experiments (quantification for 15 sections each), which all showed highly  
 251 significant differences according to a Student's t test (\*\*\*\*,  $p < 0.0001$ ).

252

253

254

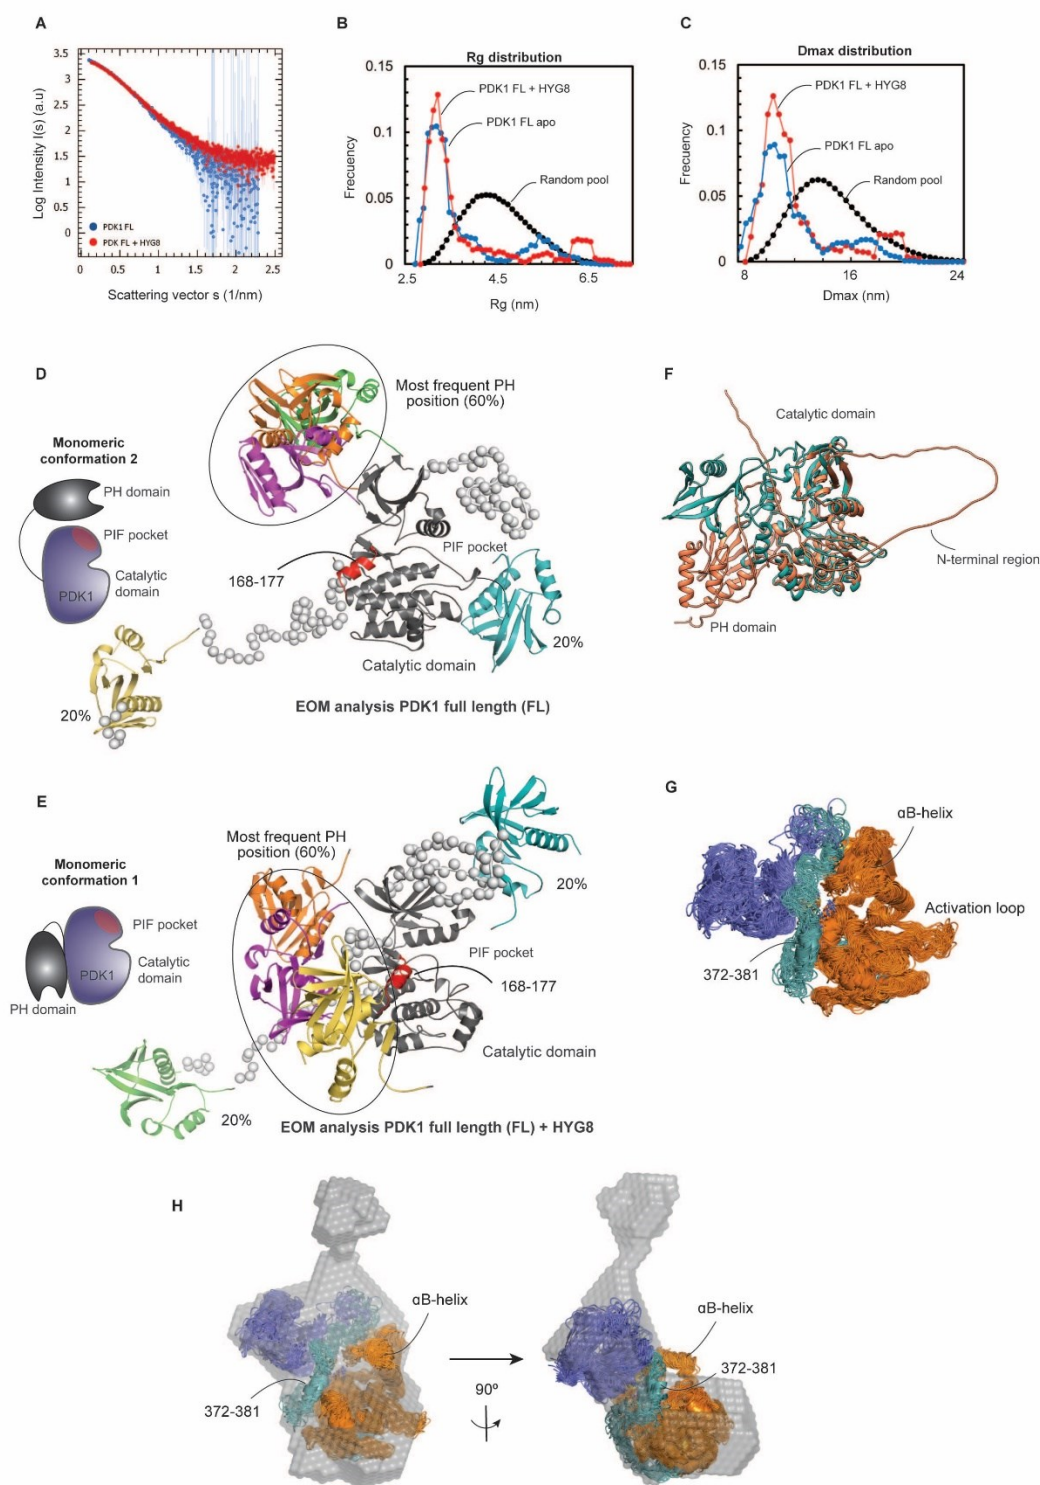

256  
 257 **Figure S8. SEC-SAXS experiments of PDK1.** (A) Scattering plot (obtained using  
 258 CHROMIXS) corresponding to SEC-SAXS data from PDK1 FL in the absence and presence  
 259 of HYG8. (B-C) EOM analysis of SEC-SAXS data from PDK1 full-length in the absence  
 260 (blue) and presence (red) of HYG8. The “random pool” indicates the theoretical data that

261 would be expected if the position of the linker PH domain was fully flexible and randomly  
262 located in the structure. (D-E) Proposed EOM models for apo PDK1 full-length in the  
263 absence (D) and presence of HYG8 (E). Dummy atoms predicted for the linker and N-  
264 terminal region are only shown for one of the five EOM models to simplify the overall  
265 representation. The catalytic domain shown in E is slightly rotated to the right in comparison  
266 to D to achieve a clearer view of five alternative positions of the PH domain. (F) Proposed  
267 model for PDK1 full-length in the presence of HYG8 (see also Fig. 7A) in cyan aligned to the  
268 proposed model by AlphaFold (salmon). Both model structures protect the “back” of the  
269 catalytic domain. (G) Molecular dynamics (MD) of the proposed model for PDK1 in the  
270 presence of HYG8 (presented in Fig. 7A). (H) The MD of the modeled structure of PDK1 is  
271 shown fitted into the most representative ab initio low resolution structure DAMMIF (Fig. 4K)  
272 of His-PDK1<sub>1-556</sub> + HYG8 determined from experimental SAXS data (light grey).  
273

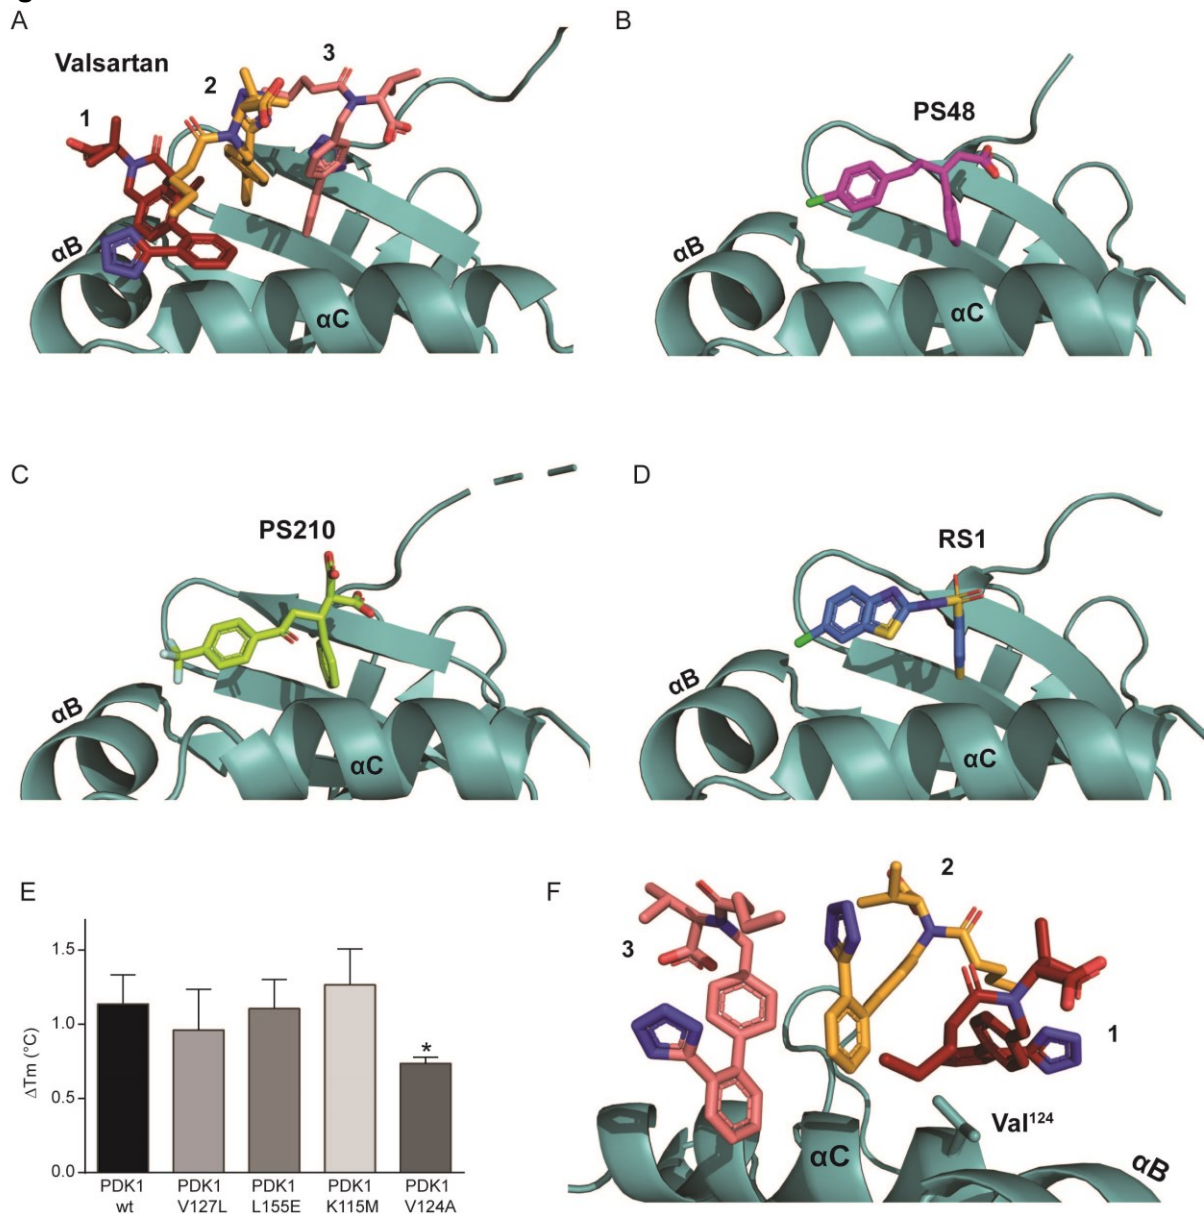

275

276 **Figure S9. Structural comparison between the binding mode of valsartan and other**  
 277 **small molecules that target the PIF pocket.** (A) Structure of PDK1 CD (PDK1<sub>50-359</sub>) in  
 278 complex with valsartan. (B) PDK1 CD bound to PS48 (PDB: 3HRF, (53)). (C) PDK1 bound to  
 279 PS210 (PDB: 4AW1, (28)). (D) PDK1 bound to RS1 (PDB: 4RQK, (30)). (E) Differential  
 280 scanning fluorimetry of WT and PIF pocket mutants of PDK1<sub>1-556</sub> to determine the effect of  
 281 valsartan (100  $\mu$ M) on melting temperature ( $T_m$ ). N=4 independent experiments for each  
 282 group. \*  $p < 0.05$  One-way ANOVA followed by Dunnet post-hoc multiple comparisons tests  
 283 (PDK1 WT as the control condition). (F) Structure of PDK1 CD PIF pocket in complex with  
 284 valsartan showing that Val<sup>124</sup> interacts with valsartan molecule #1.

285

286 **Figure S10**

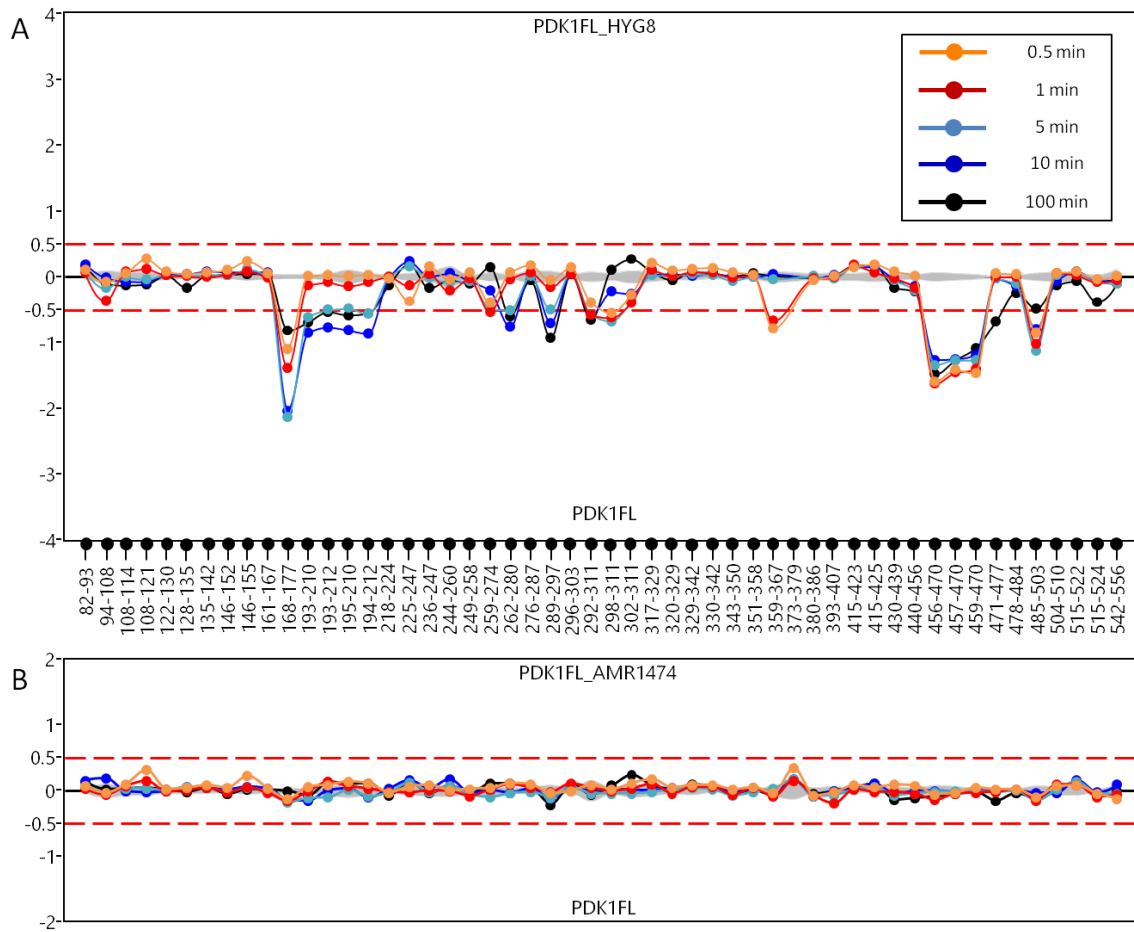

287

288 **Figure S10. Hydrogen/deuterium exchange profiles.** (A) The graph shows the difference  
 289 in deuterium incorporation between PDK1 FL (PDK1<sub>1-556</sub>) and PDK1 FL + HYG8 for each of  
 290 the detected peptides. N=3 independent experiments. (B) The difference plot between PDK1  
 291 FL and PDK1 FL + AMR1474. N=3 independent experiments.

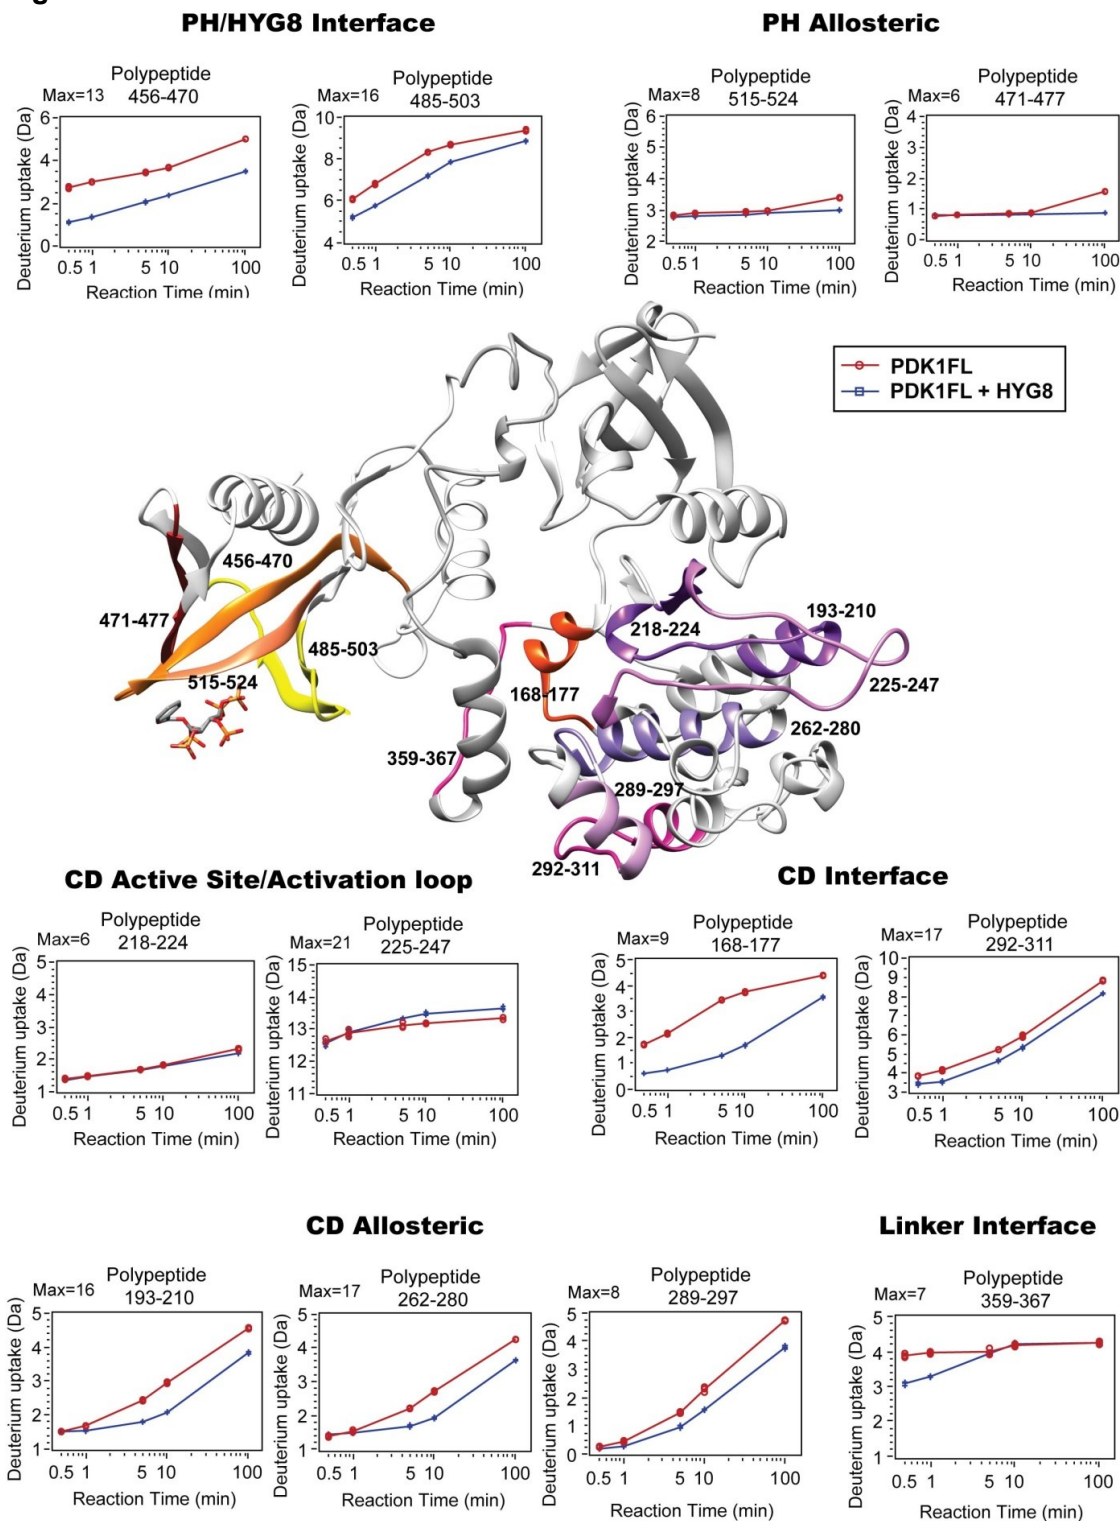

293

294 **Figure S11. The H/D exchange results and the model of full-length PDK1 in the**  
 295 **conformation stabilized by HYG8.** The structural model of PDK1<sub>77-549</sub> is presented at the  
 296 center, indicating polypeptides identified by H/D exchange. The inset graphics show the time  
 297 course of the protection of the different polypeptides in the absence or presence of HYG8.  
 298 The polypeptides are grouped according to the structural feature that explains the effect  
 299 observed. N=3 independent experiments.

300 **Figure S12**

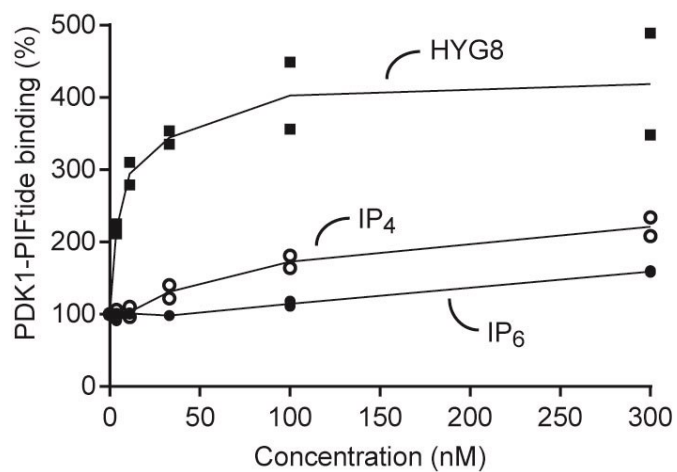

301

302 **Figure S12. Effect of the PIP<sub>3</sub> head group on the interaction between PDK1 and PIFtide.**  
303 AlphaScreen interaction assay between GST-PDK1<sub>1-556</sub> (1 nM) and biotin-PIFtide (5 nM) in  
304 the presence of HYG8, IP<sub>4</sub> or IP<sub>6</sub>. N=2 independent experiments.

305



306 **Table S1:** Thermo Fisher/Invitrogen's SelectScreen® Profiling Service. IC<sub>50</sub> was calculated  
 307 from 10-point titration experiment in which each data point was obtained from N=2  
 308 independent experiments. Z'-factor is indicated as a measure of data quality.

| Compound        | Kinase Assay | IC <sub>50</sub> (nM) | Hill slope | R <sup>2</sup> value | Z'   |
|-----------------|--------------|-----------------------|------------|----------------------|------|
| HYG8            | Cascade      | 6.42                  | 2.19       | 0.9810               | 0.62 |
| IP <sub>5</sub> | PDK1 direct  | 577                   | 1.33       | 0.9921               | 0.78 |
| HYG6            | PDK1 direct  | 449                   | 1.11       | 0.9950               | 0.78 |
| HYG7            | PDK1 direct  | 29                    | 1.39       | 0.9994               | 0.78 |
| HYG8            | PDK1 direct  | 24.5                  | 1.39       | 0.9985               | 0.78 |
| HYG14           | PDK1 direct  | 16.2                  | 1.61       | 0.9958               | 0.82 |
| IP <sub>6</sub> | PDK1 direct  | >>10,000              | -2.18      | 0.3276               | 0.78 |

309

310 **Table S2:** Single point results from Thermo Fisher/Invitrogen's "PDK1 Direct":  
 311 SelectScreen® Profiling Service. N=2 independent experiments. Z'-factor is indicated as a  
 312 measure of data quality.

| Compound Name                  | Kinase Assay | Inhibition at 1 μM (%) | % Inhibition |         | Z'   |
|--------------------------------|--------------|------------------------|--------------|---------|------|
|                                |              |                        | Point 1      | Point 2 |      |
| HYG6                           | PDK1 Direct  | 59                     | 53           | 64      | 0.76 |
| HYG7                           | PDK1 Direct  | 100                    | 101          | 99      | 0.76 |
| HYG8                           | PDK1 Direct  | 98                     | 97           | 98      | 0.76 |
| HYG14                          | PDK1 Direct  | 100                    | 98           | 101     | 0.76 |
| IP <sub>5</sub>                | PDK1 Direct  | 66                     | 63           | 69      | 0.88 |
| <i>scyllo</i> -IP <sub>5</sub> | PDK1 Direct  | -9                     | -8           | -10     | 0.88 |
| AMR1474                        | PDK1 Direct  | 10                     | 9            | 11      | 0.88 |
| IP <sub>6</sub>                | PDK1 Direct  | 8                      | 8            | 7       | 0.80 |

313

314 **Table S3.** Temperature stabilization of PDK1<sub>1-556</sub> by inositol phosphates and derivatives (N=3  
 315 independent experiments).

| Compound                       | ΔTm (°C) |       |
|--------------------------------|----------|-------|
|                                | 1 μM     | 20 μM |
| IP <sub>6</sub>                | 6.2      | 9.0   |
| AMR1474                        | 2.9      | 6.0   |
| <i>scyllo</i> -IP <sub>5</sub> | 4.7      | 7.3   |
| IP <sub>5</sub>                | 5.3      | 11.9  |
| HYG6                           | 7.8      | 9.9   |
| HYG7                           | 12.6     | 14.5  |
| HYG8                           | 11.7     | 13.7  |
| HYG14                          | 15.2     | 16.5  |

316

317

318 **Table S4. Displacement of His-PDK1<sub>1-556</sub> interaction with GST-PDK1<sub>360-556</sub> by inositol**  
 319 **phosphates and derivatives in the absence or presence of PIFtide.**

| Compound                       | PDK1 1-556 + PDK1 360-556 |               |              |              |
|--------------------------------|---------------------------|---------------|--------------|--------------|
|                                |                           |               | with PIFtide |              |
|                                | IC50 (nM)                 | 95% CI        | IC50 (nM)    | 95% CI       |
| IP <sub>6</sub> *              | -                         | -             | -            | -            |
| AMR1474                        | 458                       | 225 to 934    | 159          | 12 to 2027   |
| <i>scyllo</i> -IP <sub>5</sub> | 124.2                     | 28 to 545     | 140          | 69 to 282    |
| IP <sub>5</sub>                | 67                        | 28.3 to 158.6 | 59.4         | 44.6 to 79.1 |
| HYG6                           | 27                        | 18 to 41      | 17.9         | 13.2 to 24.4 |
| HYG7                           | 22.6                      | 20 to 25.7    | 22.7         | 18.9 to 27.3 |
| HYG8                           | 33.3                      | 23.9 to 46.5  | 19.5         | 10.3 to 36.9 |
| HYG14                          | 29.6                      | 24.7 to 35.4  | 29.4         | 16.2 to 53.3 |

320 \* Does not reach complete displacement.

321

322 **Table S5. Structural parameters and molecular mass determination obtained from**  
 323 **Batch-SAXS**

|                                            | Apo PDK 1 CD      | Apo PDK1 FL     | PDK1 FL + HYG8  |
|--------------------------------------------|-------------------|-----------------|-----------------|
|                                            | <b>BATCH-SAXS</b> |                 |                 |
| <b>Rg from Guinier (nm)</b>                | 2.36 (± 0.01)     | 4.26 (± 0.04)   | 3.75 (± 0.02)   |
| <b>Dmax from P(r) (nm)</b>                 | 7.0 (± 0.3)       | 14.0 (± 0.2)    | 12.5 (± 0.4)    |
| <b>Porod Volume Vp (nm<sup>3</sup>)</b>    | 60.5              | 123.2           | 103.3           |
| <b>MW from Porod (kDa) (MW ~ Vp / 1.6)</b> | 38                | 77              | 65              |
| <b>MW Vc (kDa)</b>                         | 32 (± 4)          | 88 (± 8)        | 53 (± 5)        |
| <b>MW Bayesian (kDa)</b>                   | 32 (31-34; 96%)   | 94 (90-99; 96%) | 53 (53-60; 96%) |

324

325 **Table S6. Data collection and refinement statistics for crystallography**

---

PDK1-CD-Valsartan

---

**Data collection**

|                                   |        |
|-----------------------------------|--------|
| Wavelength (Å)                    | 0.9801 |
| Crystal-to-detector distance (mm) | 116.54 |
| Rotation range per image (°)      | 0.1    |
| No. of frames                     | 3600   |
| Exposure time per image (s)       | 0.025  |

**Indexing and scaling**

|                                                             |                             |
|-------------------------------------------------------------|-----------------------------|
| Space group                                                 | C2                          |
| Cell dimensions                                             |                             |
| <i>a</i> , <i>b</i> , <i>c</i> (Å)                          | 148.51, 44.59, 48.21        |
| $\alpha$ , $\beta$ , $\gamma$ (°)                           | 90, 101.32, 90              |
| Resolution (Å)                                              | 36.51 – 1.31 (1.39 – 1.31)* |
| Mosaicity (°)                                               | 0.100                       |
| <i>R</i> <sub>meas</sub>                                    | 0.055 (1.306)               |
| CC <sub>1/2</sub> (%)                                       | 99.9 (74.4)                 |
| <i>I</i> / $\sigma$ ( <i>I</i> )                            | 15.9 (1.0)                  |
| Completeness (%)                                            | 99.4 (97.4)                 |
| Redundancy                                                  | 6.7 (6.6)                   |
| Solvent content (%)                                         | 45                          |
| Overall <i>B</i> -factor from Wilson plot (Å <sup>2</sup> ) | 25                          |

**Refinement**

|                                                     |               |
|-----------------------------------------------------|---------------|
| No. of reflections                                  | 73419         |
| <i>R</i> <sub>work</sub> / <i>R</i> <sub>free</sub> | 0.199 / 0.224 |
| No. of atoms                                        |               |
| Protein                                             | 2354          |
| Ligand/ion                                          | 110           |
| Water                                               | 133           |
| <i>B</i> -factors (Å <sup>2</sup> )                 |               |
| Protein                                             | 24            |
| Ligand/ion                                          | 39            |
| Water                                               | 29            |
| Overall                                             | 25            |
| R.m.s deviations (101)                              |               |
| Bond lengths (Å)                                    | 0.009         |
| Bond angles (°)                                     | 1.11          |
| <b>MolProbity validation (102)</b>                  |               |
| Clashscore                                          | 4.54          |
| MolProbity Score                                    | 1.25          |
| <i>Ramachandran plot</i>                            |               |
| Favored (%)                                         | 97.9          |
| Allowed (%)                                         | 2.1           |
| Disallowed (%)                                      | -             |
| <b>Protein Data Bank deposition</b>                 |               |
| PDB code                                            | 8DQT          |

---

326 \*Values in parentheses are for the highest-resolution shell.
